# Supplementary material for: An expression quantitative trait loci-guided co-expression analysis for constructing regulatory network using a rice recombinant inbred line population
Source: PubMed Central journal article supplement (PMC3935569; doi:10.1093/jxb/ert464), 2014-01-13
Supplement: supp_ert464_jexbot108209_file001.pdf [file supp_ert464_jexbot108209_file001.pdf]

# **An eQTL guided co-expression analysis for constructing regulatory network using a rice RIL population**

Jia Wang, Huihui Yu, Xiaoyu Weng, Weibo Xie, Caiguo Xu, Xianghua Li, Jinghua Xiao & Qifa Zhang\*

## Supplementary Figure S1

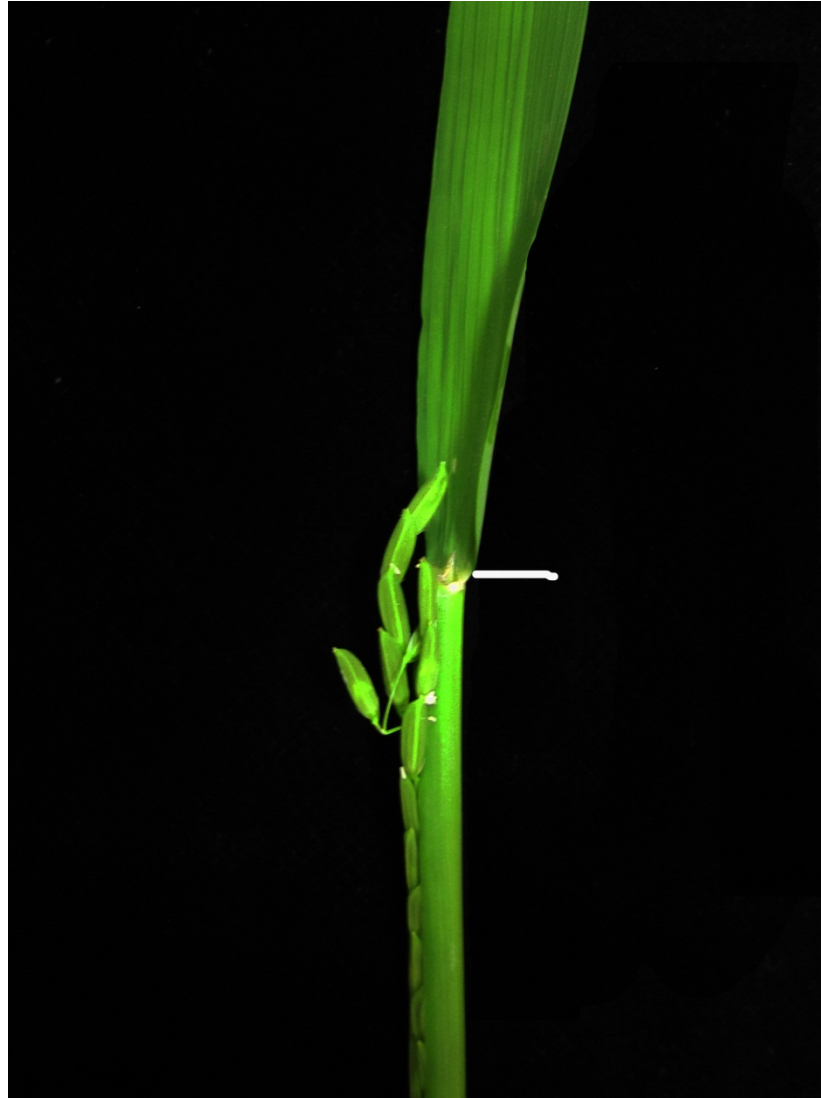

Supplementary Figure S1. An example for the flag leaf we harvested at heading stage. The white bar means the sampling site and the whole leaf were used in the research

## Supplementary Figure S2

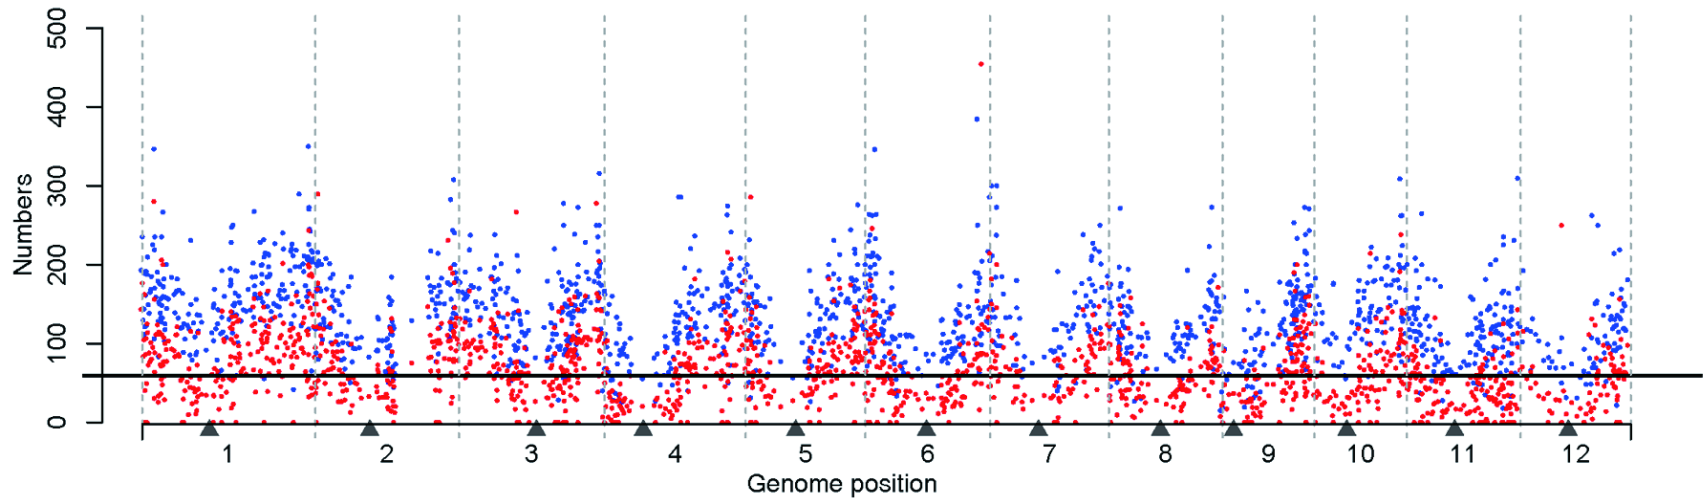

Supplementary Figure S2. The distribution of e-traits and probesets with locus-support in the genome. The x-axis indicates genomic locations by chromosomal order, and the y-axis indicates the density of e-traits in the genomic region (measured by the numbers of e-traits/Mb and locus-supported probesets/Mb in each bin). The red and blue points indicate e-traits and locus-supported probesets respectively. The grey triangle shows the position of centromere. The horizontal bar means the number of all e-traits/genome size.

## Supplementary Figure S3

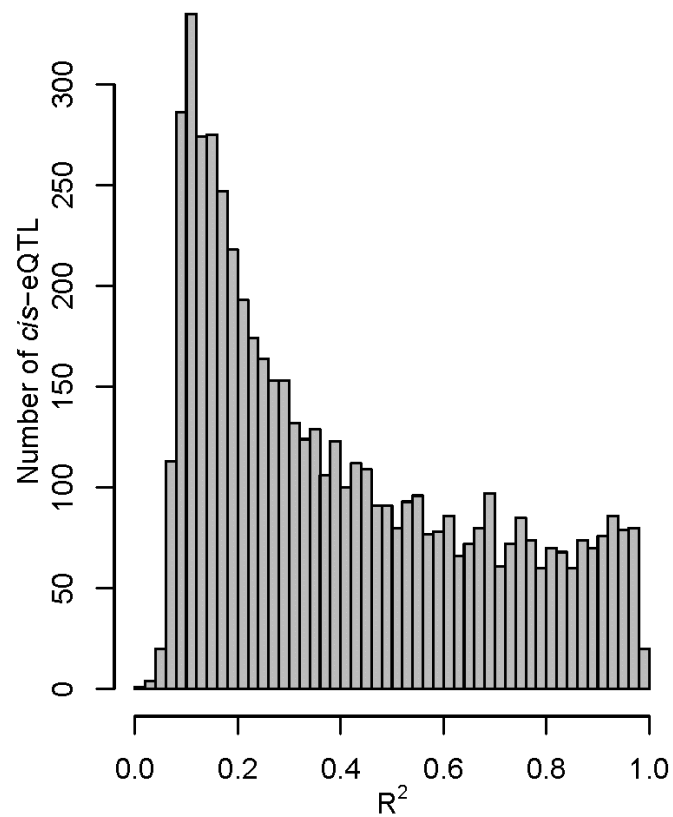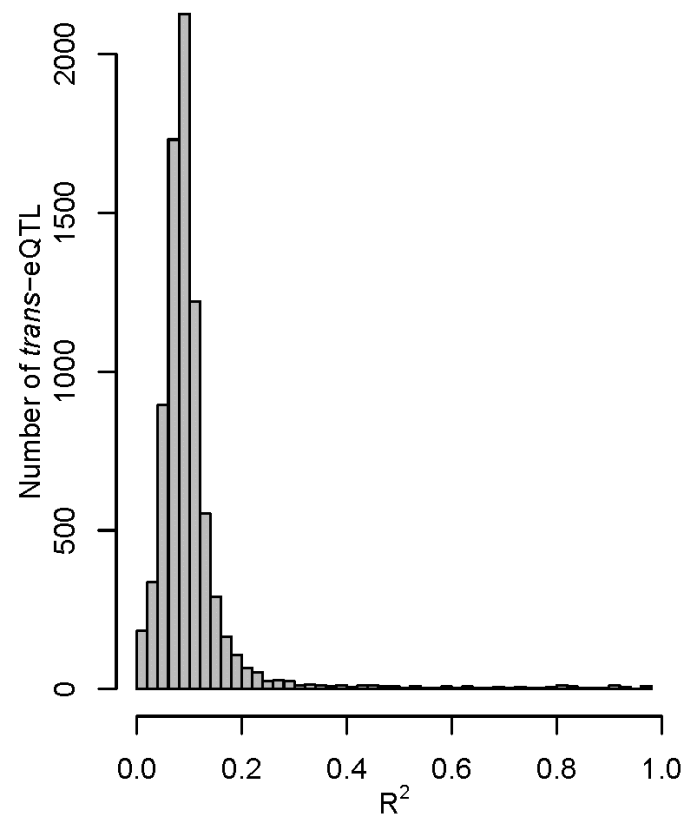

Supplementary Figure S2. Distribution of  $R^2$  values for *cis*-eQTLs and *trans*-eQTLs individually.

$R^2$  values represent expression variation for the corresponding e-traits explained by the eQTLs.

(a) The histogram of  $R^2$  values for *cis*-eQTLs.

(b) The histogram of  $R^2$  values for *trans*-eQTLs.

## Supplementary Figure S4

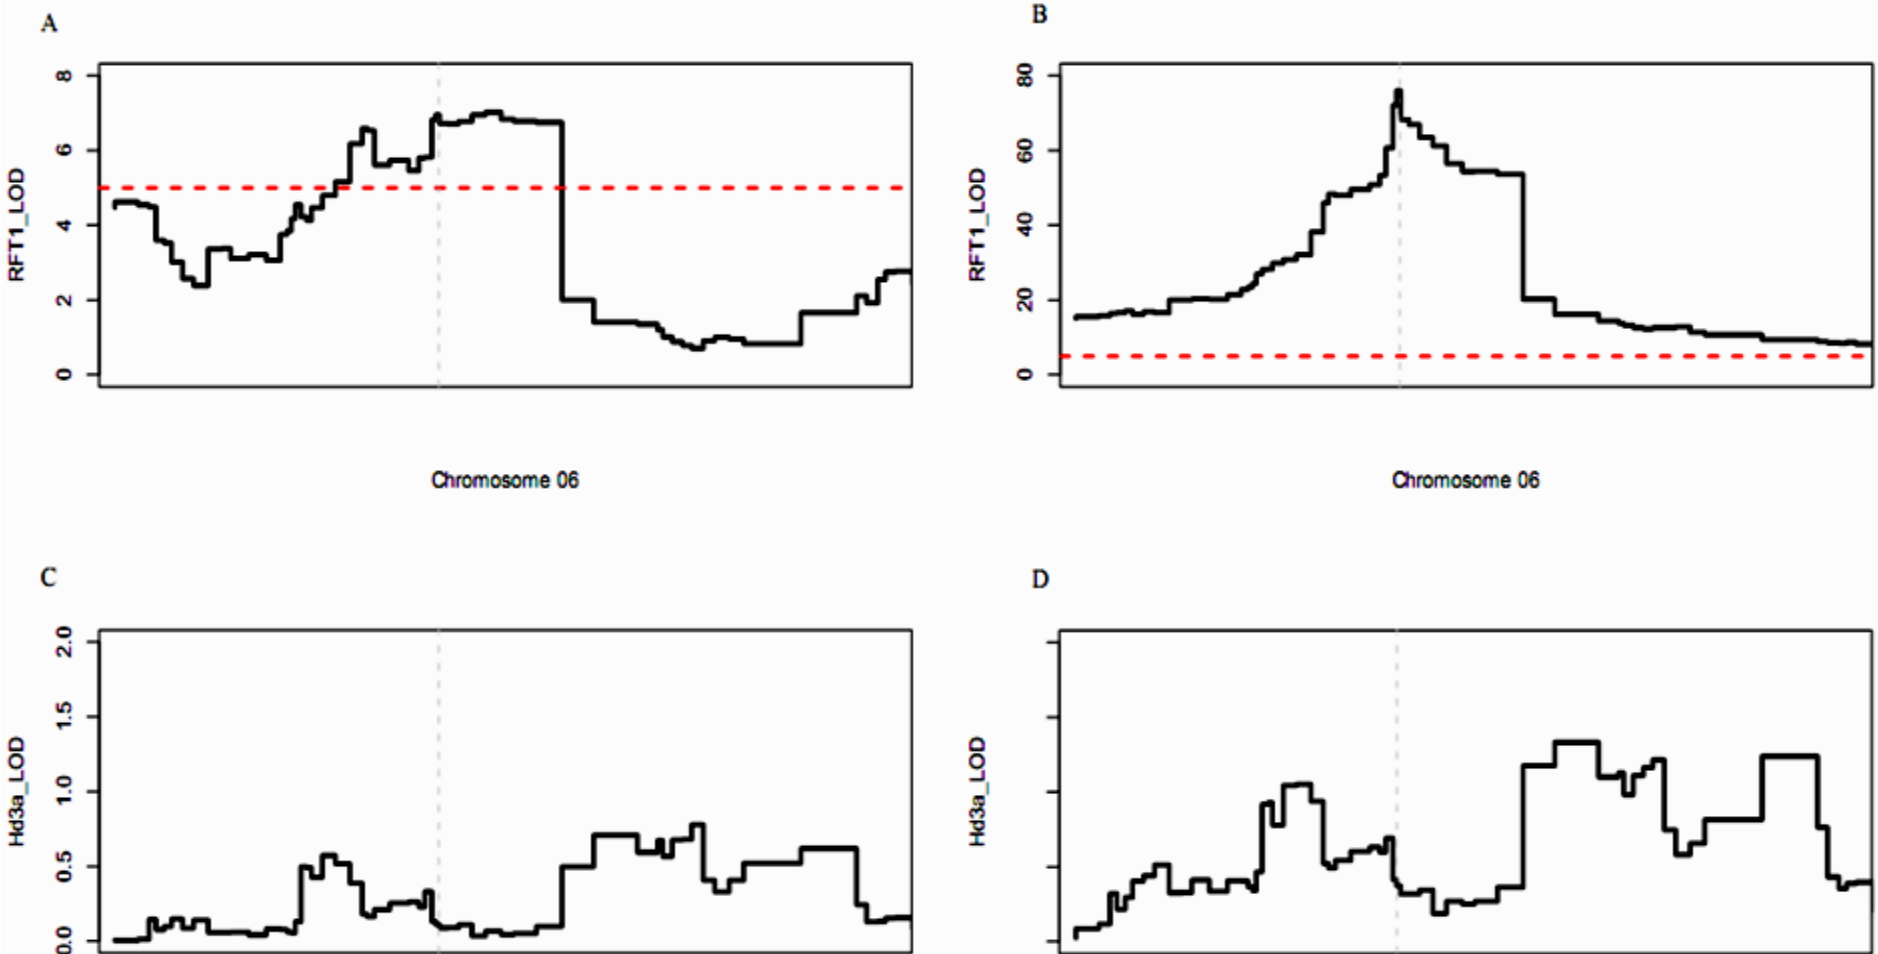

Supplementary Figure S3. LOD curve for expression variation which was calculated with the full set of probesets and modified probesets of *RFT1* and *Hd3a* on chr06.

A, LOD curve for expression variation with the full set of probesets of *RFT1* on chr06.

B, modified probesets of *RFT1*.

C, the full set of probesets of *Hd3a*.

D, modified probesets of *Hd3a*.

## Supplementary Figure S5

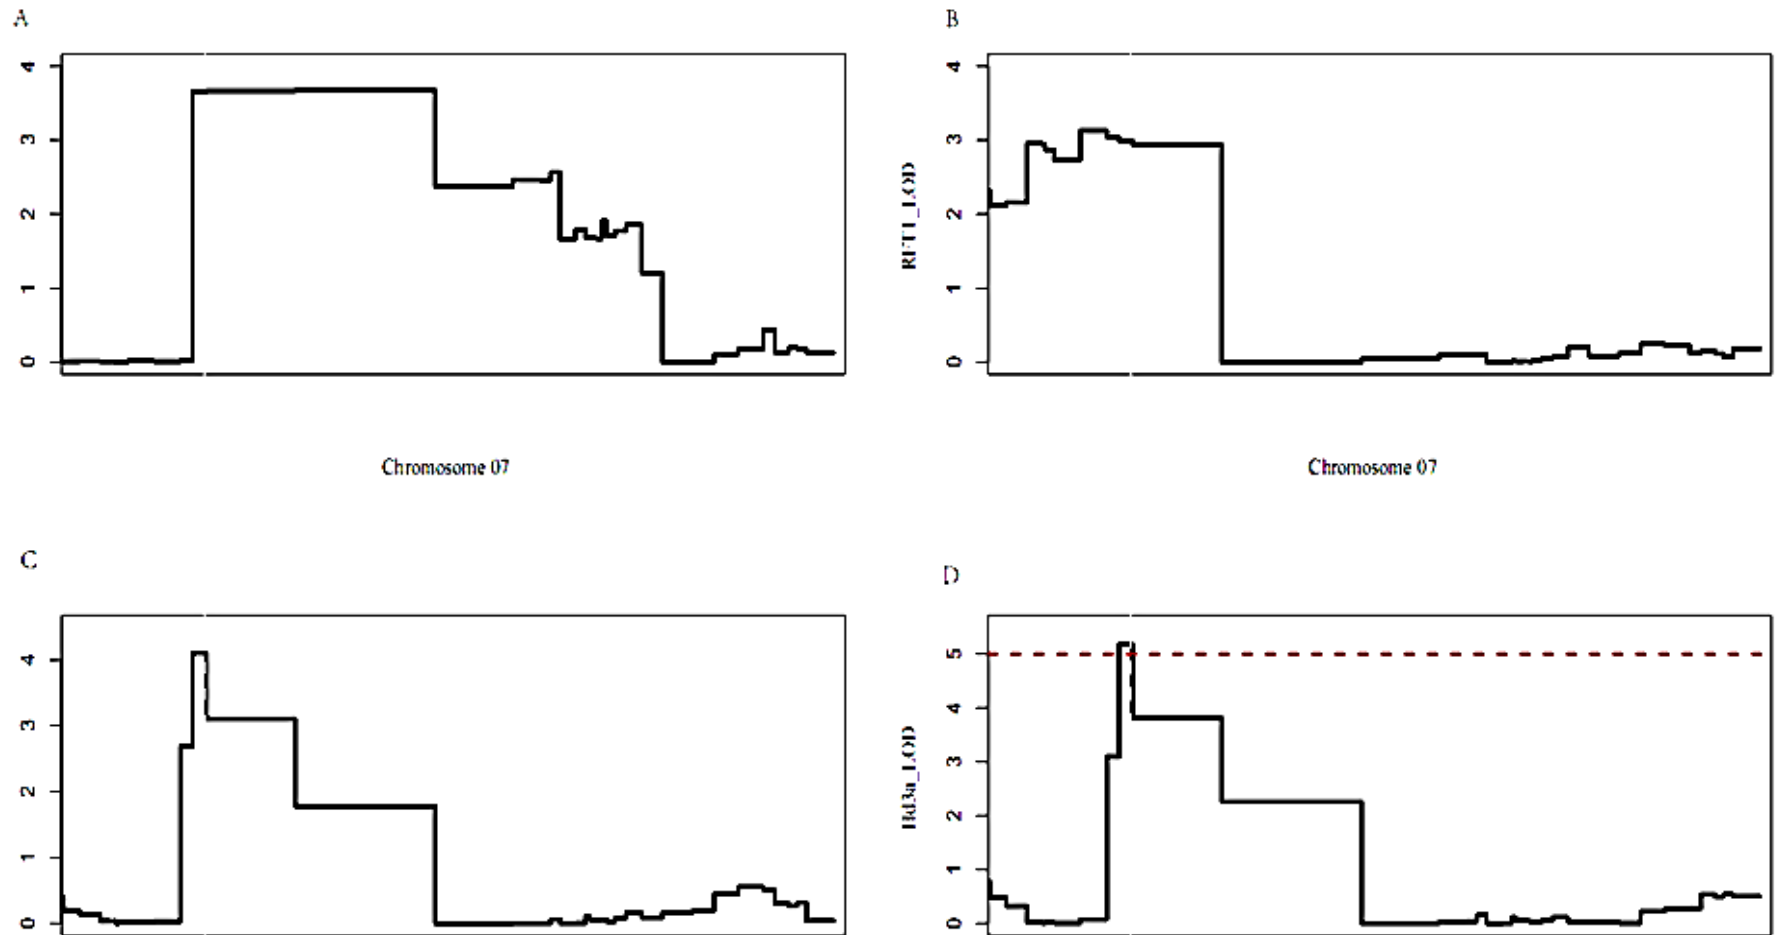

Supplementary Figure S4. LOD curve for expression variation which was calculated with the full set of probesets and modified probesets of *RFT1* and *Hd3a* on chr07.

A, LOD curve for expression variation with the full set of probesets of *RFT1* on chr07.

B, modified probesets of *RFT1*.

C, the full set of probesets of *Hd3a*.

D, modified probesets of *Hd3a*.

## Supplementary Figure S6

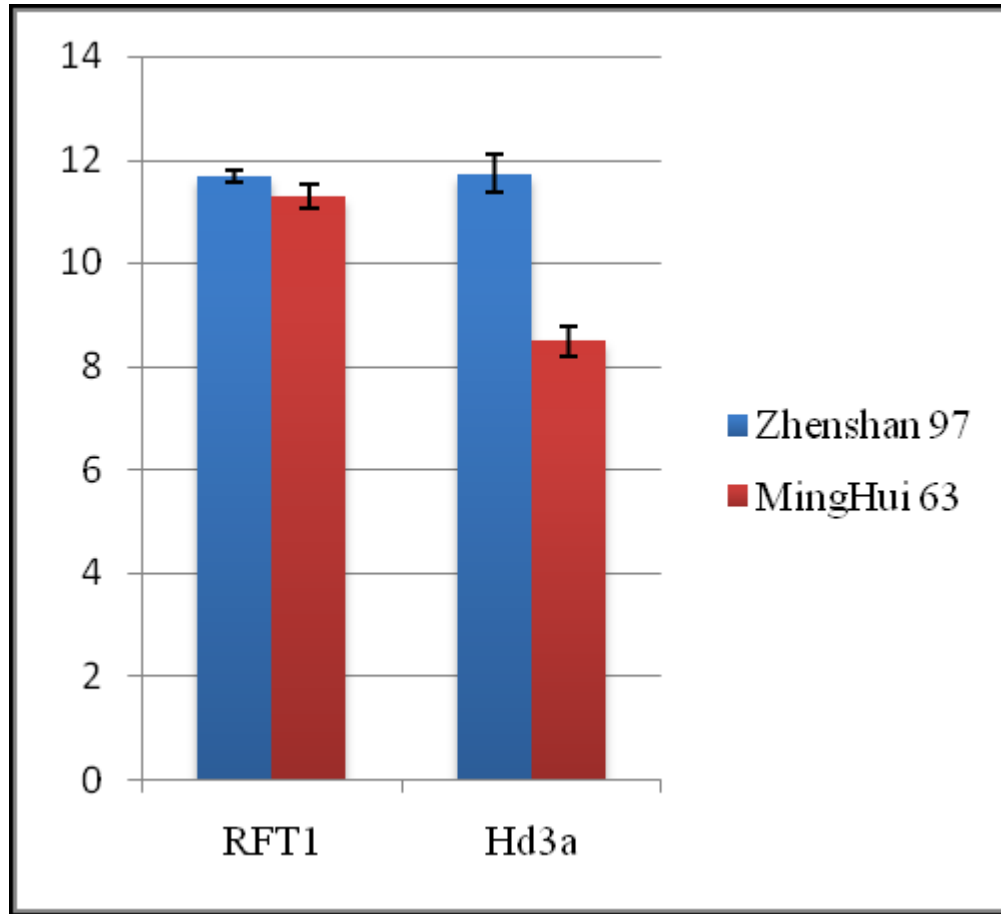

Supplementary Figure S5. The gene expression levels for *RFT1* and *Hd3a* in Zhenshan97 and Minghui 63 of three biological replicates.
